# Supplementary material
Source: Springer Nature journal article supplement (https://www.springermedizin.de/resource/supplementary/13054_2013_2600_MOESM3_ESM.pdf/9714432)

■ More negative than -13% strain (ie: better RV function)

■ Less negative than -13% strain (ie: worse RV function)

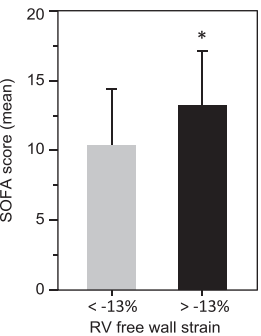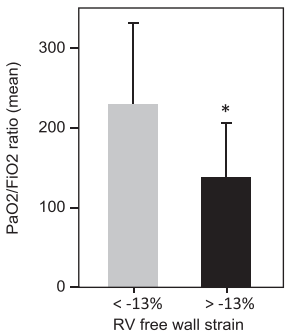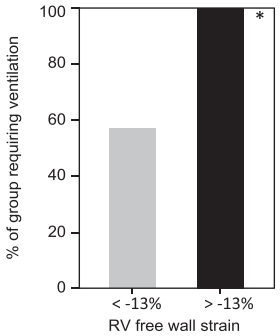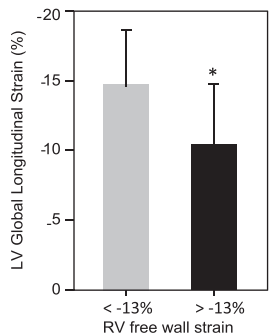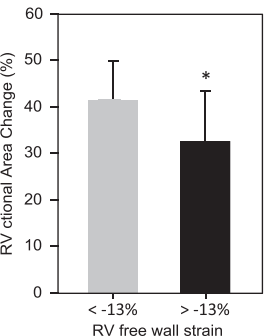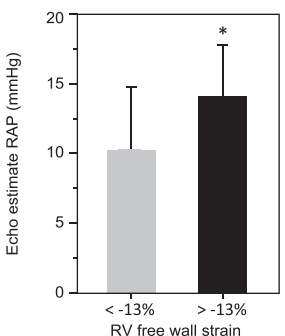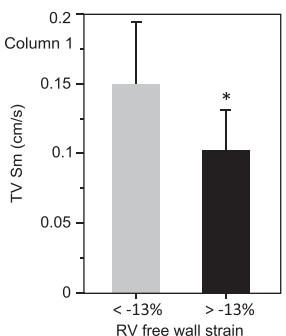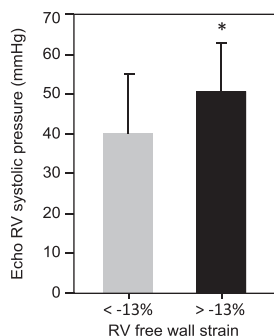

Supplement: MOESM3 [file 9714432]
